# Supplementary material for: 50–100 μm-thick pseudocapacitive electrodes of MnO2 nanoparticles uniformly electrodeposited in carbon nanotube papers
Source: Royal Society of Chemistry journal article supplement (doi:10.1039/c6ra06433g), 2016-01-01
Supplement: c6ra06433g1.pdf [file c6ra06433g1.pdf]

***Electronic supplementary information for***

**50–100- $\mu\text{m}$ -thick pseudocapacitive electrodes of  $\text{MnO}_2$  nanoparticles uniformly electrodeposited in carbon nanotube papers**

Misato Narubayashi, Zhongming Chen, Kei Hasegawa and Suguru Noda\*

Department of Applied Chemistry, Waseda University, 3-4-1 Okubo, Shinjuku-ku, Tokyo 169-8555, Japan

E-mail: [noda@waseda.jp](mailto:noda@waseda.jp)

**Table S1** Summary of structures and capacitances of all MnO<sub>2</sub>-CNT hybrid electrodes.

| Condition                      | Before electrodeposition         |                 |                              | After electrodeposition          |                 |                              |                         | Capacitance at 2–200 mV/s  |              |                                    |
|--------------------------------|----------------------------------|-----------------|------------------------------|----------------------------------|-----------------|------------------------------|-------------------------|----------------------------|--------------|------------------------------------|
|                                | Areal mass<br>mg/cm <sup>2</sup> | Thickness<br>μm | Density<br>g/cm <sup>3</sup> | Areal mass<br>mg/cm <sup>2</sup> | Thickness<br>μm | Density<br>g/cm <sup>3</sup> | MnO <sub>2</sub><br>wt% | Areal<br>F/cm <sup>2</sup> | Total<br>F/g | MnO <sub>2</sub> -<br>based<br>F/g |
| <b>Pristine</b>                | 1.00                             | 25.0            | 0.40                         |                                  |                 |                              |                         | 0.02–0.01                  | 24–13        |                                    |
| <b>CP 1.2 V</b>                |                                  |                 |                              |                                  |                 |                              |                         |                            |              |                                    |
| 2 min                          | 1.18                             | 29.7            | 0.40                         | 1.98                             | 46.0            | 0.43                         | 40.3                    | 0.16–0.12                  | 80–61        | 164–131                            |
| 10 min                         | 1.23                             | 30.0            | 0.41                         | 6.75                             | 84.7            | 0.80                         | 81.8                    | 0.81–0.34                  | 120–51       | 142–59                             |
| 30 min                         | 1.18                             | 30.7            | 0.39                         | 8.52                             | 86.0            | 0.99                         | 86.1                    | 1.03–0.29                  | 121–34       | 137–38                             |
| <b>CP 1.3 V</b>                |                                  |                 |                              |                                  |                 |                              |                         |                            |              |                                    |
| 2 min                          | 1.25                             | 31.7            | 0.39                         | 4.01                             | 47.3            | 0.85                         | 68.9                    | 0.45–0.27                  | 112–67       | 152–91                             |
| 10 min                         | 0.57                             | 18.3            | 0.31                         | 5.22                             | 47.3            | 1.10                         | 89.0                    | 0.32–0.18                  | 61–35        | 66–38                              |
| 30 min                         | 0.75                             | 19.0            | 0.39                         | 6.24                             | 54.7            | 1.14                         | 88.0                    | 0.39–0.24                  | 63–39        | 68–42                              |
| <b>CC 2 mA/cm<sup>2</sup></b>  |                                  |                 |                              |                                  |                 |                              |                         |                            |              |                                    |
| 10 min                         | 1.28                             | 31.0            | 0.41                         | 1.40                             | 33.0            | 0.42                         | 8.5                     | 0.07–0.04                  | 51–26        | 346–161                            |
| 30 min                         | 1.43                             | 30.0            | 0.48                         | 1.92                             | 38.0            | 0.51                         | 25.5                    | 0.11–0.08                  | 56–40        | 153–121                            |
| 90 min                         | 1.14                             | 28.0            | 0.41                         | 4.64                             | 63.0            | 0.74                         | 75.4                    | 0.37–0.22                  | 81–48        | 99–59                              |
| 180 min                        | 1.13                             | 29.0            | 0.39                         | 8.52                             | 60.0            | 1.42                         | 86.7                    | 0.52–0.25                  | 61–29        | 66–31                              |
| <b>CC 20 mA/cm<sup>2</sup></b> |                                  |                 |                              |                                  |                 |                              |                         |                            |              |                                    |
| 9 min                          | 1.21                             | 30.0            | 0.40                         | 6.26                             | 77.0            | 0.81                         | 80.6                    | 0.72–0.33                  | 114–53       | 135–63                             |
| 18 min                         | 0.97                             | 33.7            | 0.29                         | 7.54                             | 108.0           | 0.70                         | 87.1                    | 0.87–0.22                  | 116–29       | 130–32                             |
| <b>Pulse 2.0 V</b>             |                                  |                 |                              |                                  |                 |                              |                         |                            |              |                                    |
| ×15                            | 1.03                             | 32.7            | 0.32                         | 2.61                             | 71.9            | 0.36                         | 60.3                    | 0.25–0.17                  | 98–65        | 167–100                            |
| ×30                            | 0.85                             | 31.8            | 0.27                         | 3.88                             | 74.7            | 0.52                         | 78.0                    | 0.35–0.22                  | 90–55        | 109–67                             |
| ×45                            | 1.02                             | 36.2            | 0.28                         | 5.17                             | 104.0           | 0.50                         | 80.3                    | 0.51–0.30                  | 99–57        | 117–68                             |
| ×60                            | 0.96                             | 37.1            | 0.26                         | 6.59                             | 110.0           | 0.60                         | 85.4                    | 0.62–0.29                  | 94–44        | 106–49                             |

Thickness was measured by micrometre and thus somewhat larger (due to the surface roughness of the samples) than the value by SEM in Table S2.

**Table S2** Structures and capacitances of the representative MnO<sub>2</sub>-CNT hybrid electrodes.

| Condition                        | After electrodeposition          |                 |                              |                         | Capacitance at 2–200 mV/s  |                    |                                 |
|----------------------------------|----------------------------------|-----------------|------------------------------|-------------------------|----------------------------|--------------------|---------------------------------|
|                                  | areal mass<br>mg/cm <sup>2</sup> | thickness<br>μm | density<br>g/cm <sup>3</sup> | MnO <sub>2</sub><br>wt% | Areal<br>F/cm <sup>2</sup> | Gravimetric<br>F/g | Volumetric<br>F/cm <sup>3</sup> |
| CP 1.2 V, 10 min                 | 6.75                             | 62.0            | 1.088                        | 81.8                    | 0.81–0.34                  | 120–51             | 131–56                          |
| CC 20 mA/cm <sup>2</sup> , 9 min | 6.26                             | 71.5            | 0.876                        | 80.6                    | 0.72–0.33                  | 114–53             | 100–46                          |
| Pulse x45                        | 5.17                             | 53.5            | 0.967                        | 80.3                    | 0.51–0.30                  | 99–57              | 96–55                           |

Thickness was measured by cross-sectional SEM and thus somewhat smaller than the value by micrometre in Table S1.

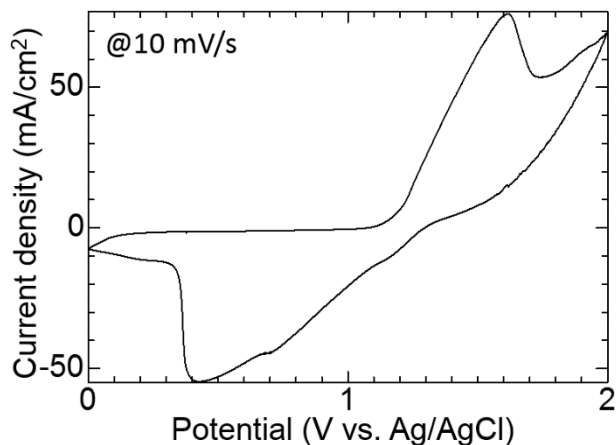

**Fig. S1** Typical current behavior during electrodeposition of MnO<sub>2</sub> in 0.6 M MnSO<sub>4</sub>/0.8 M H<sub>2</sub>SO<sub>4</sub> aqueous electrolyte at a scan rate of 10 mV/s.

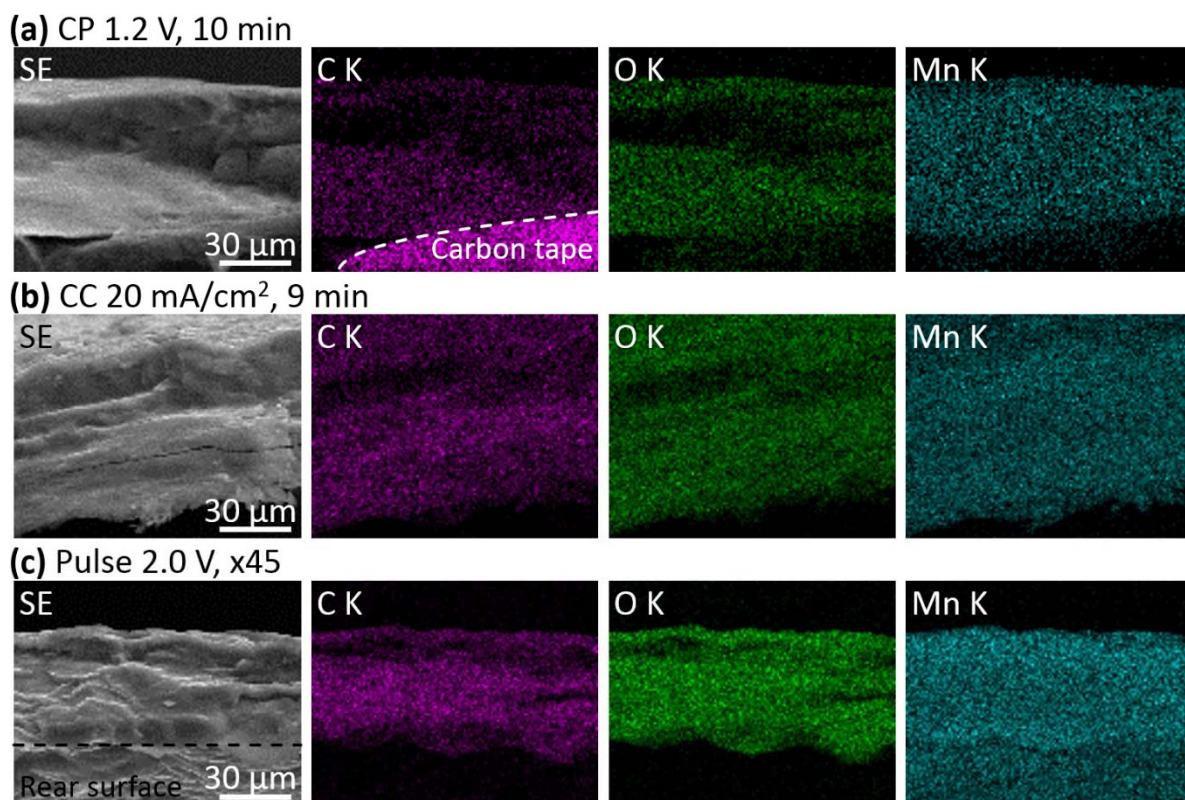

**Fig. S2** SEM-EDS elemental mapping of the cross-section of the representative MnO<sub>2</sub>-CNT hybrids taken at an acceleration voltage of 18 kV and magnification of x1,000. It is clearly shown that Mn is uniformly deposited throughout the CNT paper.

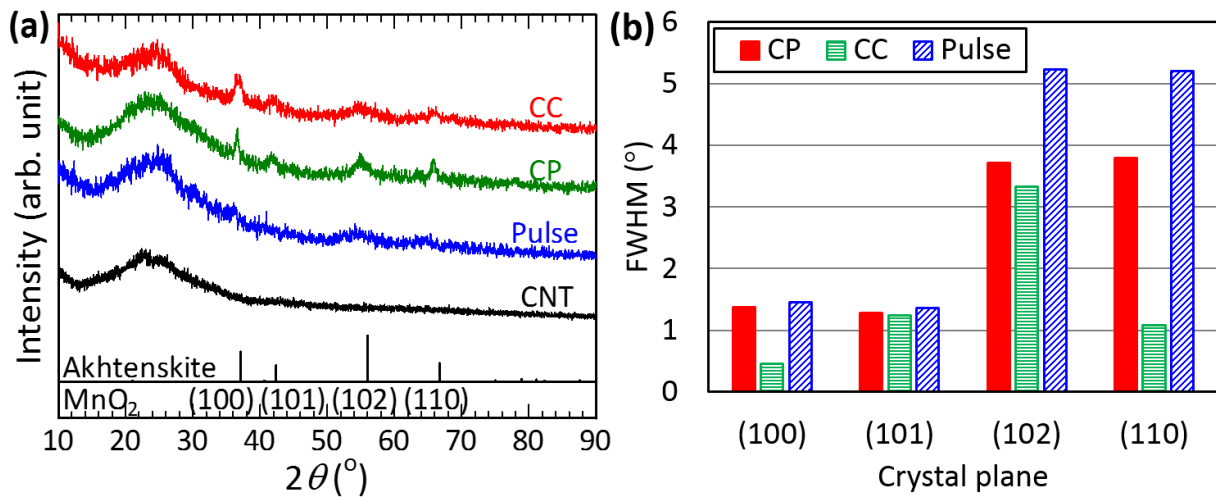

**Fig. S3** (a) XRD spectra of CNT papers without and with MnO<sub>2</sub> nanoparticles and (b) FWHM values of the peaks of Akhtenskite MnO<sub>2</sub>.

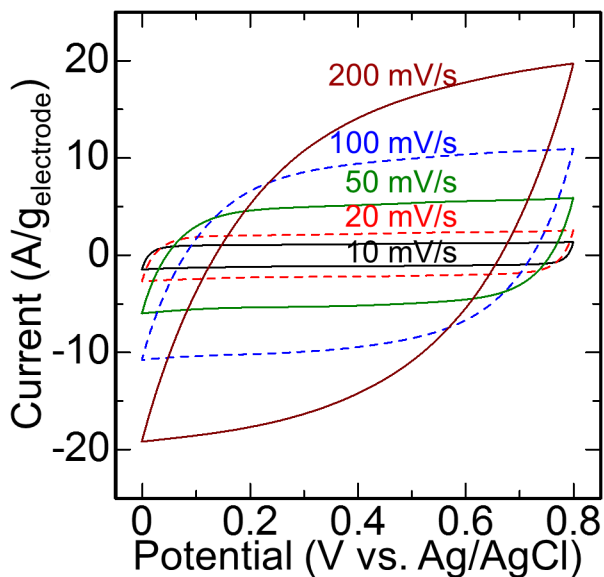

**Fig. S4** Typical CV curves of the MnO<sub>2</sub>-CNT electrode measured in 1 M Na<sub>2</sub>SO<sub>4</sub> aqueous solution with a AC-CNT hybrid electrode as the counter electrode and an Ag/AgCl electrode as the reference. MnO<sub>2</sub> was electrodeposited by CP at 1.20 V for 10 min.

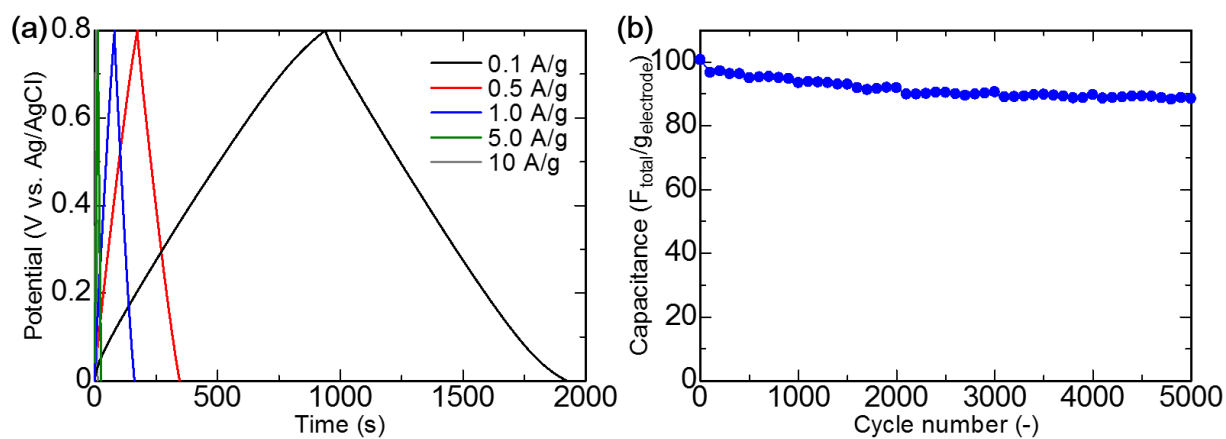

**Fig. S5** Galvanostatic charge–discharge test of a MnO<sub>2</sub>–CNT hybrid electrode deposited on 30- $\mu$ m-thick CNT paper by CP at 1.20 V for 10 min. (a) Time profiles of potential of the working MnO<sub>2</sub>–CNT electrode for different charge–discharge rates. (b) Cycle performance of the MnO<sub>2</sub>–CNT electrode measured with a charge–discharge rate of 1 A/g and potential range of 0.0–0.8 V.
